# Supplementary material for: Adsorption and oxidation of formaldehyde on a polycrystalline Pt film electrode: An in situ IR spectroscopy search for adsorbed reaction intermediates
Source: publisher site journal article supplement (doi:10.3762/bjnano.5.87), 2014-05-30
Supplement: Additional file 1 [file 2190-4286-5-87-S1.pdf]

# Supporting Information

for

## Adsorption and oxidation of formaldehyde on a polycrystalline Pt film electrode: An in situ IR spectroscopy search for adsorbed reaction intermediates

Zenonas Jusys\* and R. Jürgen Behm

Address: Institute of Surface Chemistry and Catalysis, Ulm University, Albert-Einstein-Allee 47, D-89081 Ulm, Germany

Email: Zenonas Jusys - zenonas.jusys@uni-ulm.de

\* Corresponding author

### Additional experimental details

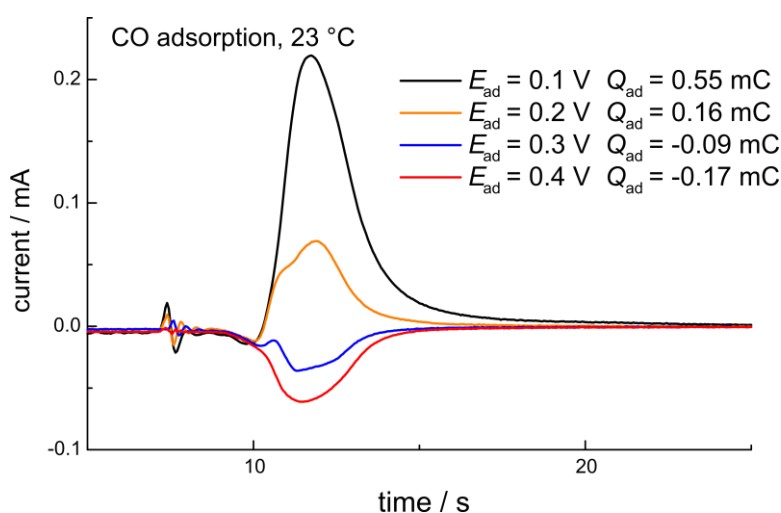

**Figure S1:** CO adsorption transients on a Pt film electrode at constant potentials (see Figure) upon admission of CO-saturated 0.5 M HClO<sub>4</sub> at room temperature.

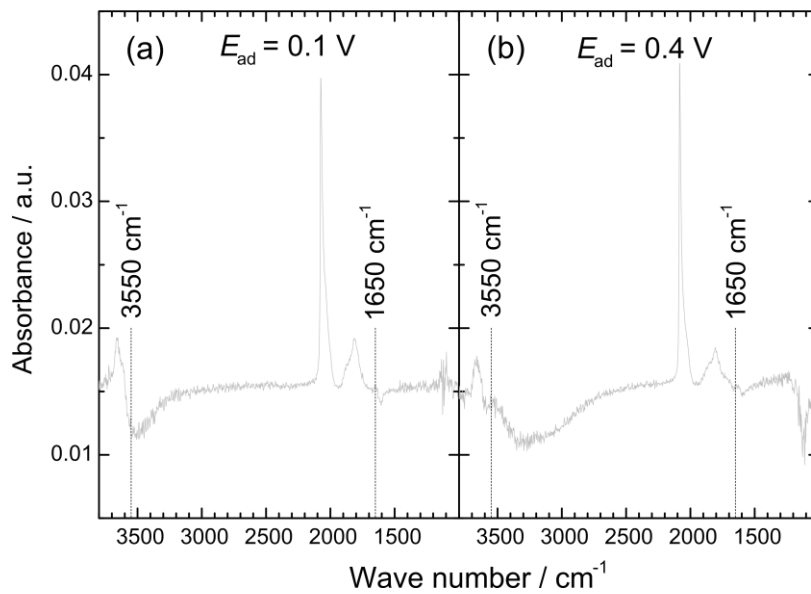

**Figure S2:** Initial ATR-FTIR spectra acquired ca. 2 s after admission of CO saturated 0.5 M HClO<sub>4</sub> solution to a Pt film electrode at: 0.1 V (a) and 0.4 V (b), room temperature.
